# Supplementary material for: Incretin hormones and type 2 diabetes
Source: PubMed Central journal article supplement (PMC10474001; doi:10.1007/s00125-023-05956-x), 2023-07-11
Supplement: 125_2023_5956_MOESM1_ESM.pdf [file 125_2023_5956_MOESM1_ESM.pdf]

## ELECTRONIC SUPPLEMENTARY MATERIAL

## Incretin hormones and type 2 diabetes

Michael A. Nauck<sup>1</sup>, Timo D. Müller<sup>2,3</sup>

<sup>1</sup>Diabetes, Endocrinology, Metabolism Section, Medical Department I, Katholisches Klinikum Bochum, St. Josef Hospital, Ruhr-University Bochum, Bochum, Germany; <sup>2</sup>Institute for Diabetes and Obesity, Helmholtz München, Neuherberg, Germany <sup>3</sup>German Center for Diabetes Research (DZD), Neuherberg, Germany

**ESM Table 1:** Subject characteristics of participants with type 2 diabetes or non-diabetic control subjects in meta-analyses comparing glucose-dependent insulinotropic polypeptide (GIP) and glucagon-like-1 (GLP-1) plasma responses (total area under the curve) after nutrient intake (oral glucose, liquid or solid meals) reported by Calanna et al. (see Figure 2)

|                                |                      | GIP <sub>total</sub> |                       | GLP-1 <sub>total</sub> |                       |
|--------------------------------|----------------------|----------------------|-----------------------|------------------------|-----------------------|
|                                |                      | Type 2 diabetes      | Non-diabetic controls | Type 2 diabetes        | Non-diabetic controls |
| Number of studies              | n                    |                      | 22                    |                        | 22                    |
| Number of patients             | n                    | 363                  | 325                   | 275                    | 279                   |
| Proportion female              | [%]                  | 51                   | 53                    | 46                     | 47                    |
| Age                            | [years]              | 54 (18-71)           | 50 (19-71)            | 55 (18-76)             | 49 (19-71)            |
| HbA <sub>1c</sub>              | [%]                  | 7.4 (6.1-9.2)        | 5.4 (3.6-6.5)         | 7.2 (5.2-9.2)          | 5.5 (4.0-6.4)         |
|                                | [mmol/mol]           | 57 (42-75)           | 31 (9-42)             | 55 (33-77)             | 37 (20-46)            |
| Fasting plasma glucose         | [mmol/l]             | 9.1 (5.3-12.0)       | 5.3 (4.6-6.0)         | 8.0 (5.0-12.0)         | 5.0 (4.0-6.4)         |
| Body-Mass-Index                | [kg/m <sup>2</sup> ] | 34 (24-52)           | 30 (22-46)            | 33 (23-46)             | 30 (22-46)            |
| Fasting GIP                    | [pmol/l]             | 18.8 (5.7-45.0)      | 17.6 (4.5-49.0)       | n.r.                   | n.r.                  |
| Fasting GLP-1 <sub>total</sub> | [pmol/l]             | n.r.                 | n.r.                  | 12.5 (5.8-23.4)        | 12.6 (4.9-31.0)       |

Means, ranges; n.r.: Not reported

**ESM Table 2:** Studies comparing insulinotropic effects of glucose-dependent insulinotropic polypeptide (GIP) and glucagon-like peptide-1 (GLP-1) in patients with type 2 diabetes and in healthy control subjects (see Figure 3): Patient characteristics and methodological details (hyperglycaemic clamp plasma glucose concentrations and duration; GIP and GLP-1 infusion rates and steady state plasma concentrations)

| Study                | Sex                           | Age         | Diabetes duration | Glycated haemoglobin (HbA <sub>1c</sub> ) | Body-Mass-Index | Diabetes treatment | GIP infusion rates                          | GIP <sub>total</sub> plasma concentrations (steady state) | GLP-1 infusion rates | GLP-1 <sub>total</sub> plasma concentrations (steady state) | Plasma glucose (clamp) | Duration of GIP/GLP-1 infusion |                    |
|----------------------|-------------------------------|-------------|-------------------|-------------------------------------------|-----------------|--------------------|---------------------------------------------|-----------------------------------------------------------|----------------------|-------------------------------------------------------------|------------------------|--------------------------------|--------------------|
| First author/year    | Group                         | Female/male | [years]           | [years]                                   | [%]             | kg/m <sup>2</sup>  | Generic drug (class) names                  | pmol · kg <sup>-1</sup> · min <sup>-1</sup>               | pmol/l               | pmol · kg <sup>-1</sup> · min <sup>-1</sup>                 | pmol/l                 | mmol/l                         | h                  |
| Nauck et al. 1993    | Type 2 diabetes patients      | 4/5         | 59 ± 10           | 8 ± 9                                     | 6.3 ± 0.6       | 28.6 ± 3.1         | Diet, sulfonylureas <sup>a</sup>            | 0.8; 2.4                                                  | ~ 450; ~ 1100        | 0.4; 1.2                                                    | ~ 100; ~ 250           | 8.0                            | 1                  |
|                      | Healthy controls <sup>b</sup> | 5/4         | 59 ± 11           | -                                         | 5.5 ± 0.2       | 26.8 ± 4.1         | -                                           | 0.8; 2.4                                                  | ~ 500; ~ 1200        | 0.4; 1.2                                                    | ~ 100; ~ 220           | 8.0                            | 1                  |
| VilSBøll et al. 2002 | Type 2 diabetes patients      | 1/7         | 55                | 6                                         | 7.4             | 29.5               | Diet, metformin, sulfonylureas <sup>a</sup> | 4; 16                                                     | ~ 350; ~ 2200        | 1                                                           | ~ 125                  | 15.0                           | 4 (2) <sup>c</sup> |
|                      | Healthy controls <sup>b</sup> | 1/5         | 54                | -                                         | 5.6             | 29.6               | -                                           | 4                                                         | ~ 350                | 1                                                           | n.r. (n=1)             | 15.0                           | 2                  |
| Højberg et al. 2009  | Type 2 diabetes patients      | n.r.        | 52 ± 9            | 5 ± 4                                     | 8.6 ± 1.3       | 31.1 ± 3.9         | Metformin, sulfonylureas <sup>a</sup>       | 1.5                                                       | ~ 130                | 0.5                                                         | ~ 45                   | 15.0                           | 2                  |
|                      | Healthy controls <sup>b</sup> | n.r.        | 51 ± 9            | -                                         | 5.3 ± 0.2       | 30.8 ± 3.9         | -                                           | 1.5                                                       | ~ 145                | 0.5                                                         | ~ 45                   | 15.0                           | 2                  |

Means ± SD; <sup>a</sup>: discontinued before the study; <sup>b</sup>: Normal oral glucose tolerance test; <sup>c</sup>: Results concerning insulin secretory responses between type 2 diabetes patients and healthy control subjects were compared for a 2 h duration; n.r.: Not reported

**ESM Table 3.** Patient characteristics of subjects with type 2 diabetes in whom the incretin effect was quantified (data presented in Figure 6)

|   | Publication (First author, year, reference) | Sex (female/male) | Age [years] | Known duration of diabetes [years] | Body-mass-index [kg/m <sup>2</sup> ] | Fasting plasma glucose [mmol/l] | 120 min plasma glucose after oral glucose [mmol/l] | HbA <sub>1c</sub> [%] | Glucose-lowering medications      |
|---|---------------------------------------------|-------------------|-------------|------------------------------------|--------------------------------------|---------------------------------|----------------------------------------------------|-----------------------|-----------------------------------|
| 1 | Nauck et al. 1986                           | 7/7               | 61 ± 11     | 7 ± 7                              | 25.2 ± 3.1                           | 8.3 ± 2.4                       | 15.1 ± 3.3                                         | n.r.                  | S (n = 5)                         |
| 2 | Knop et al. 2007                            | 2/6               | 62 (51-75)  | n.r.                               | 24 (21-26)                           | 8.1 (6.2-10.4)                  | ~ 12.3 <sup>a</sup>                                | 6.8 (6.2-8.7)         | S (n = 4), M (n = 1) <sup>b</sup> |
| 3 | Bagger et al. 2011                          | 5/3               | 57 (40-75)  | 1 (0.5-3)                          | 29 (25-34)                           | 7.7 (7.0-8.9)                   | ~ 15.5 <sup>a</sup>                                | 7.0 (6.2-8.4)         | none                              |
| 4 | Vardarli et al. 2011 <sup>c</sup>           | 3/18              | 59 ± 9      | 6 ± 3                              | 28.6 ± 2.6                           | 9.3 ± 1.1                       | ~ 16.0 <sup>a</sup>                                | 7.3 ± 0.5             | M (n= 21)                         |
| 5 | Vardarli et al. 2014 <sup>c</sup>           | 4/16              | 59 ± 7      | 5 ± 3                              | 30.6 ± 3.0                           | ~ 8.1 <sup>a</sup>              | ~ 15.5 <sup>a</sup>                                | 7.0 ± 0.6             | M (n = 15), S (n = 1)             |
| 6 | LaFerrere et al. 2007 <sup>c</sup>          | 8/0               | 45 ± 10     | 2 ± 1                              | 43.4 ± 6.8                           | 8.1 ± 1.8                       | ~ 12.2 <sup>a</sup>                                | 6.9 ± 0.7             | M or S <sup>e</sup>               |

Means ± standard deviation or median and interquartile range; n.r.: not reported; S: Sulfonylureas; M: metformin; <sup>a</sup>: Read from figures; <sup>b</sup>: Combination of S and M in 1 patient; <sup>c</sup>: At screening (before DPP-4 inhibitor treatment) <sup>d</sup>: Before gastric bypass surgery; <sup>e</sup>: Discontinued 3 days before experiments.

### References quoted in the online supplement

- [1] Faerch K, Torekov SS, Vistisen D, et al. (2015) GLP-1 response to oral glucose is reduced in prediabetes, screen-detected type 2 diabetes, and obesity and influenced by sex: The ADDITION-PRO Study. *Diabetes* 64: 2513-2525

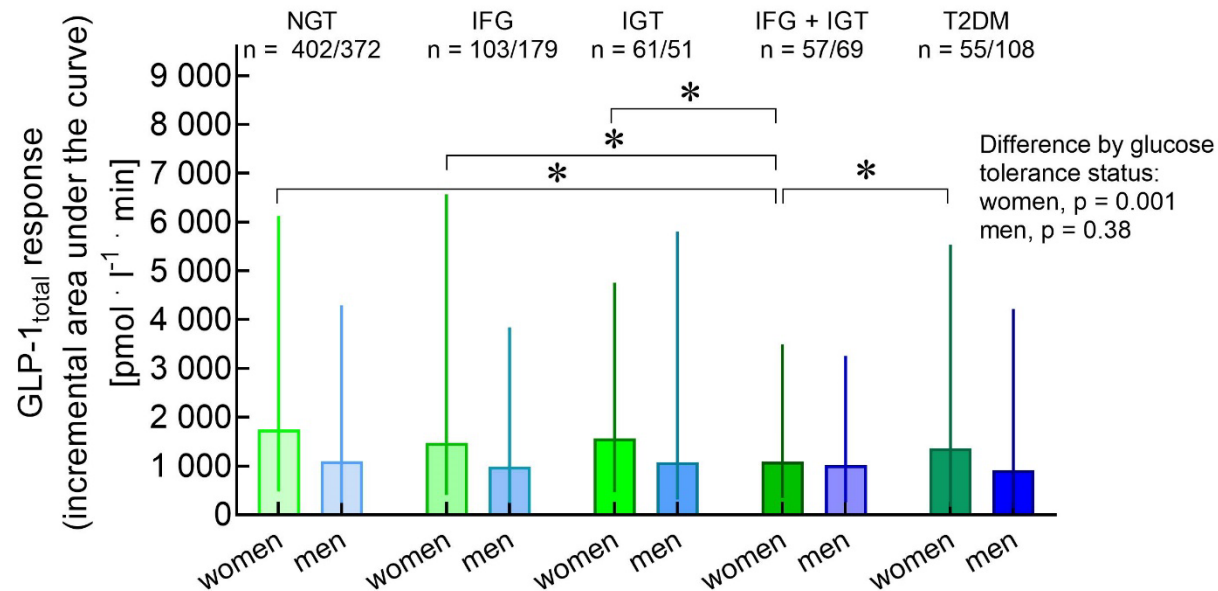

ESM Figure 1. Secretion of GLP-1 in patients with type 2 diabetes relative to subjects with no impairment in glucose tolerance or various categories of prediabetes (IFG; impaired fasting glucose; IGT: impaired glucose tolerance; IFG/IGT: Combination of impaired fasting glucose. And impaired glucose tolerance. Significant differences in incremental GLP-1<sub>total</sub> plasma responses following an oral glucose load across categories of glucose tolerance (including screen-detected type 2 diabetes) in women and men (Faerch et al. 2015 [1]). P-values are presented for the overall comparison between all groups by ANOVA (without any adjustment). Asterisks indicate significant differences in iAUC for total GLP-1 ( $p < 0.05$ ) between columns connected by brackets. Only in women, significant differences were found for selected comparisons. Inter-individual variability was high, as indicated by wide 95 % confidence intervals, in both women and men. Total AUCs (see Figure 2 B and C) did not display any significant differences by glucose tolerance status.
